# Supplementary material
Source: PubMed Central journal article supplement (PMC3522236)
Supplement: hdy201259x1.pdf [file hdy201259x1.pdf]

*O. ishikawae*

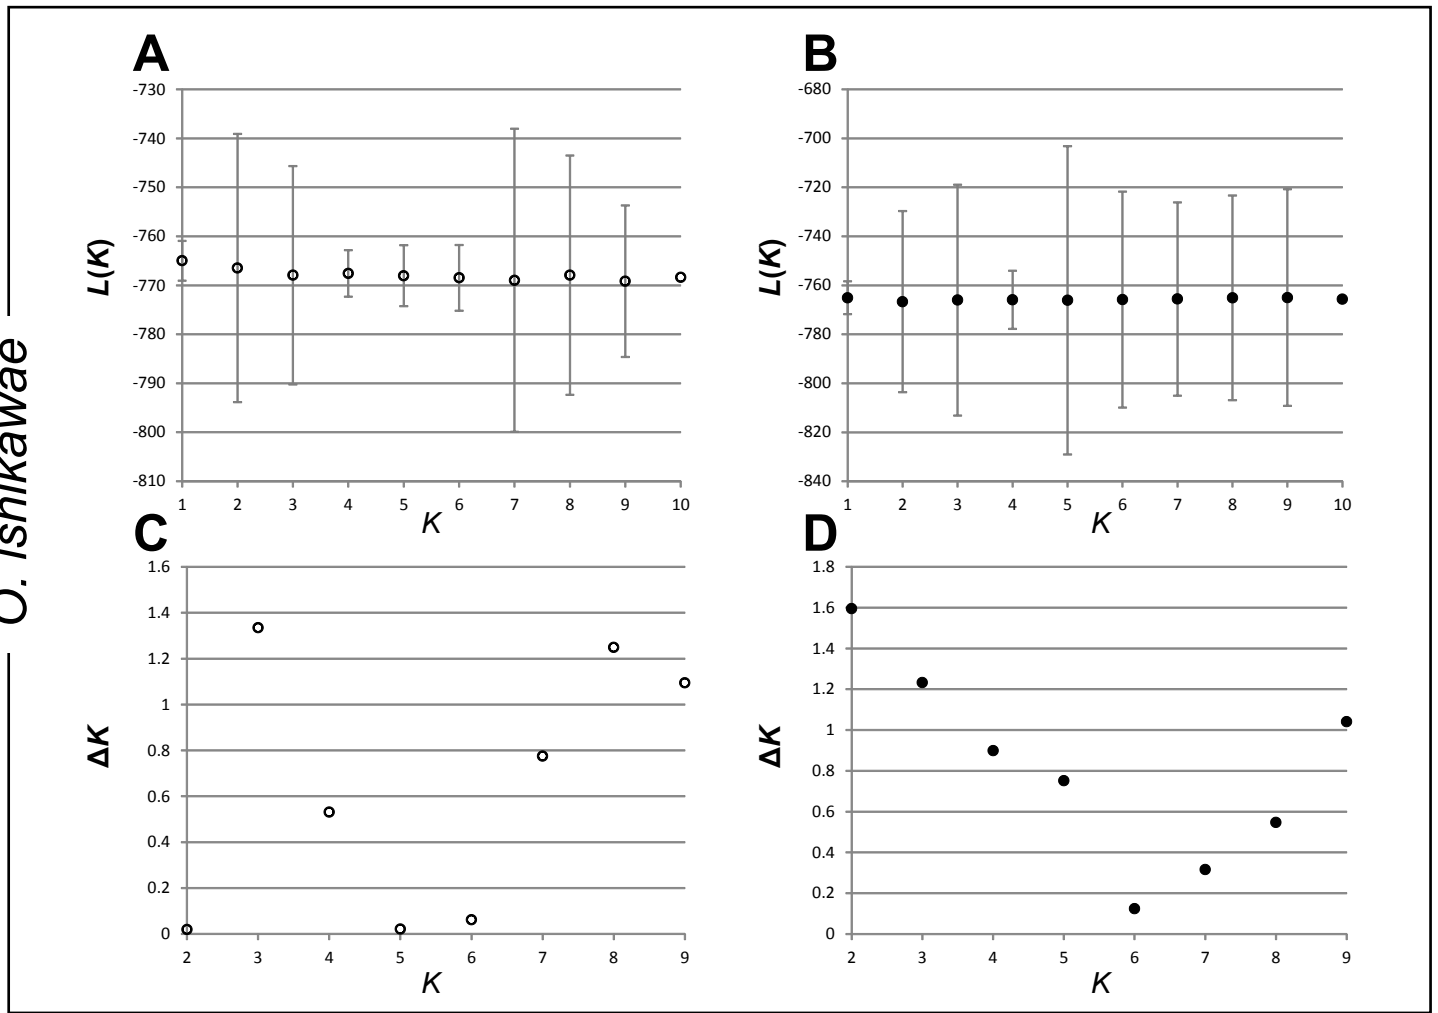

*O. splendida*

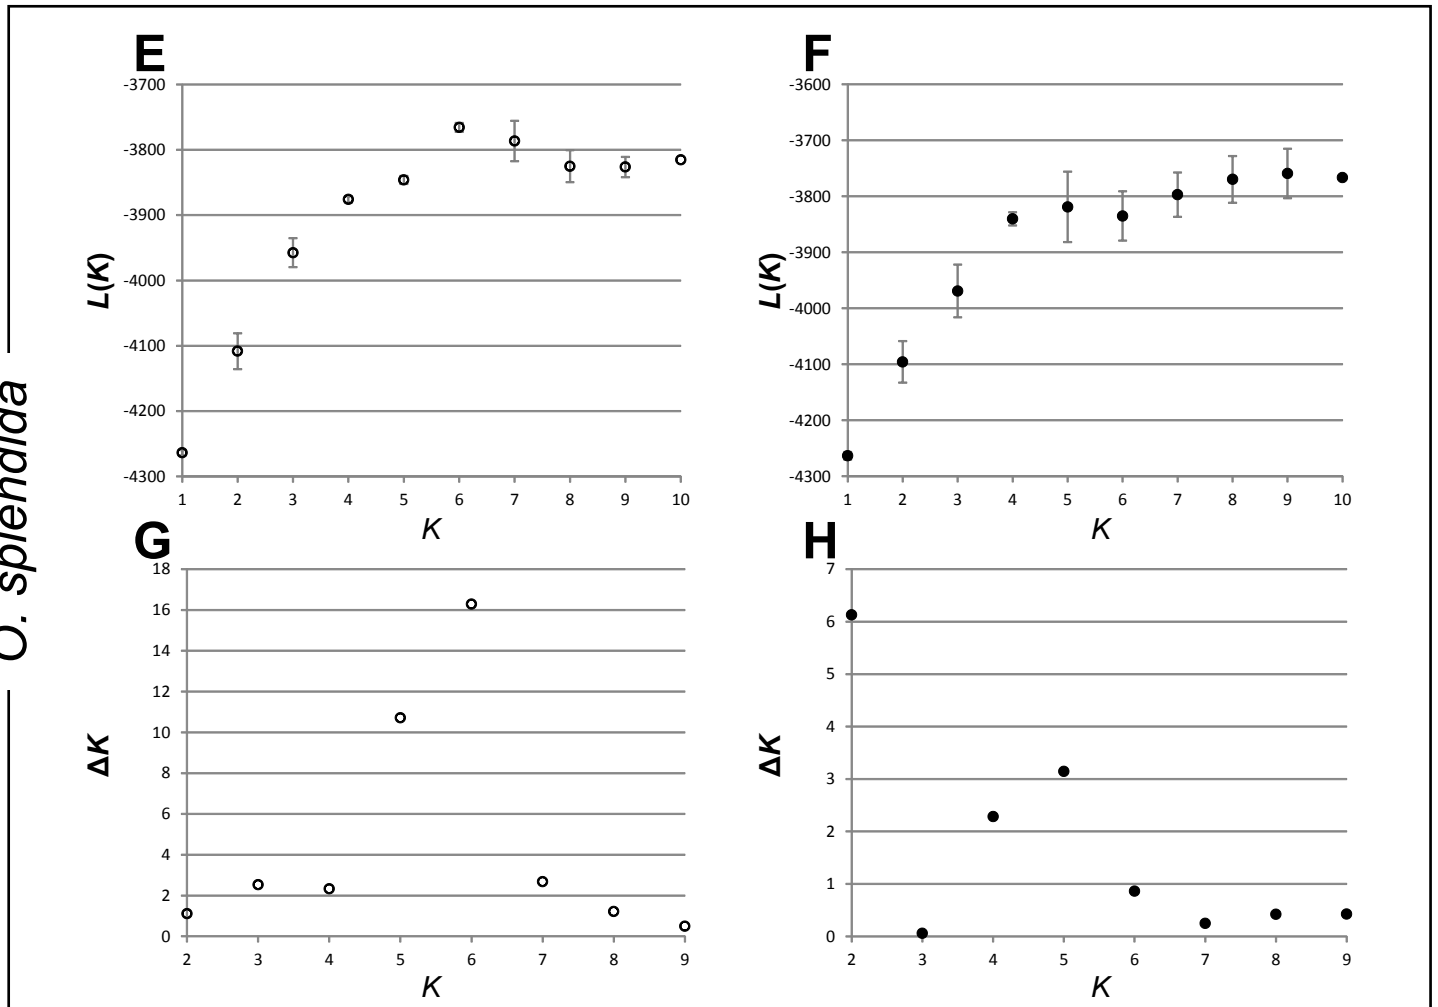

**Fig. 1S.** Plots of mean  $L(K)$  and  $\Delta K$  statistics against  $K$ . The upper graphs in each species show plots of mean  $L(K)$  ( $\pm$  SD) against  $K$  (number of genetic clusters) from STRUCTURE v2.3.3 (Hubisz et al. 2009) under admixture model (A and E: open circles) and admixture model with LOCPRIOR option (B and F: solid circles). The lower graphs in each species show plots of  $\Delta K$  statistics (Evanno et al. 2005) against  $K$  under admixture model (C and G: open circles) and admixture model with LOCPRIOR option (D and H: solid circles).
