# Supplementary material
Source: PubMed Central journal article supplement (PMC3522236)
Supplement: hdy201259x2.pdf [file hdy201259x2.pdf]

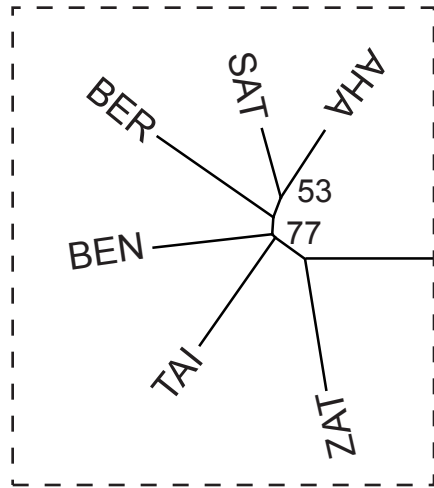

***O. ishikawae***

0.1  $D_A$  distance

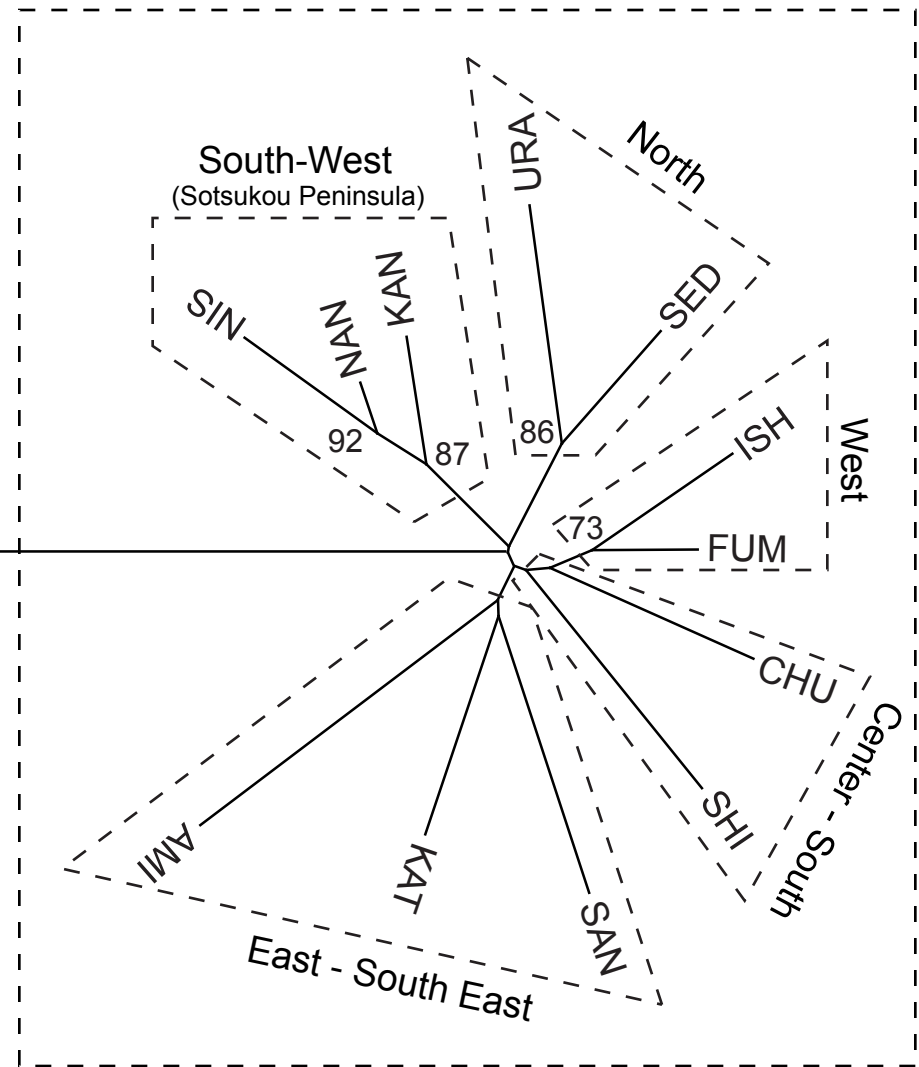

***O. splendida***

**Fig. S2.** Unrooted neighbor joining tree based on  $D_A$  distance (Nei et al., 1983). Numbers are bootstrap values (>50%) from 1,000 iterations. Boxes frame the monophyletic clades of each species and recognizable clades consisting of geographically neighboring populations of *O. splendida*.
