# Supplementary material
Source: PubMed Central journal article supplement (PMC3522236)
Supplement: hdy201259x3.pdf [file hdy201259x3.pdf]

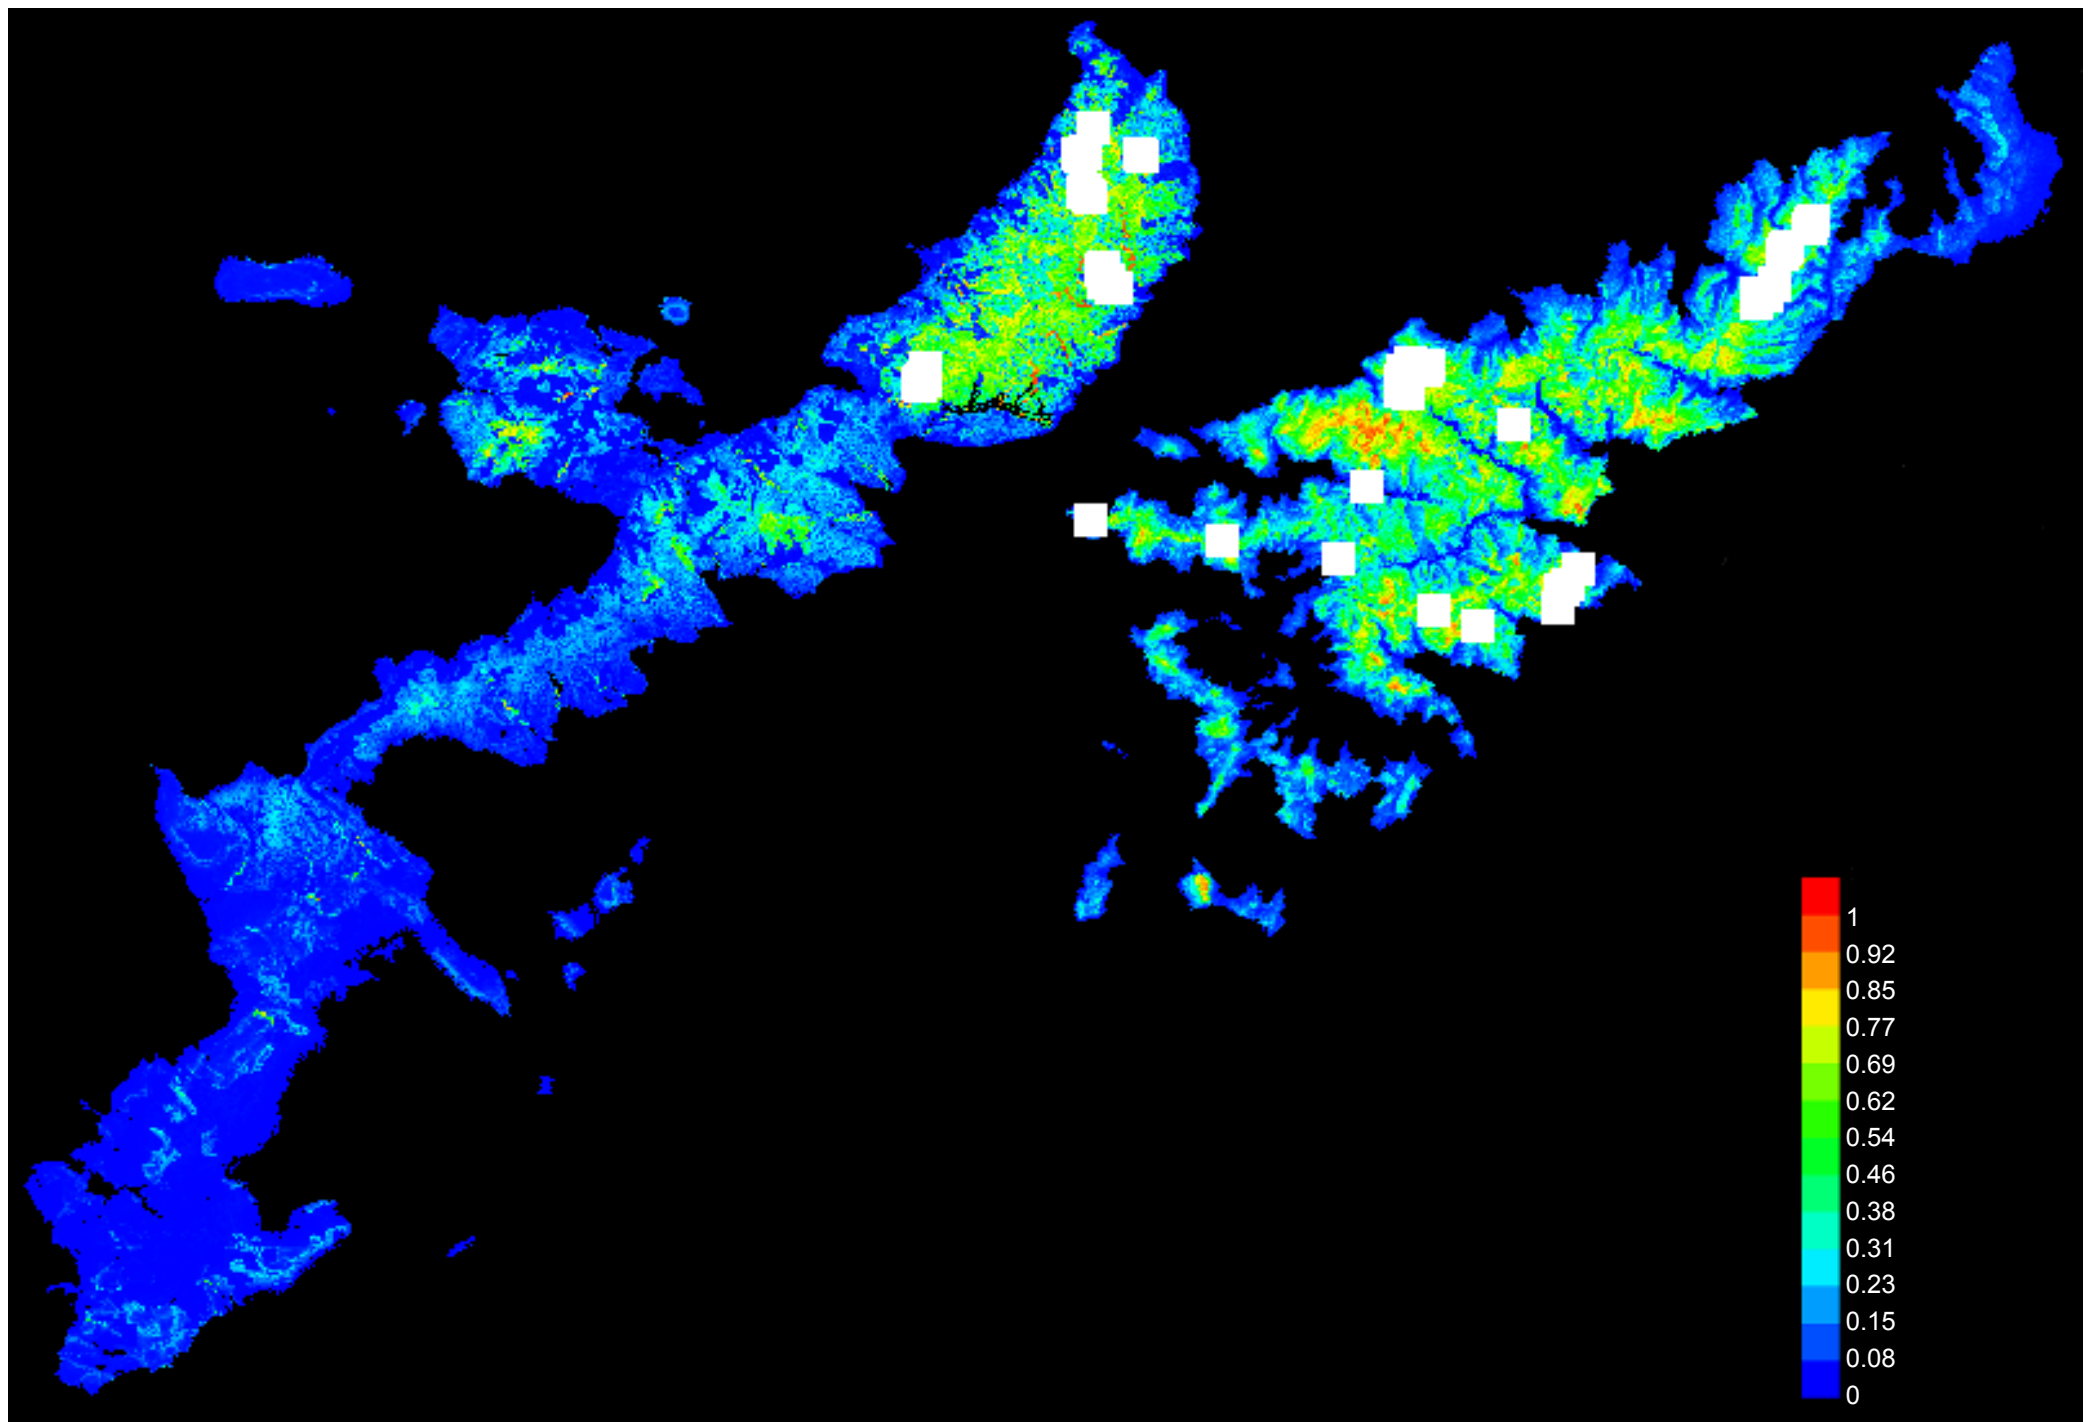

**Fig. S3.** Ecological niche models inferred from MAXENT (Phillips et al. 2006) based on six environmental variables. The map shows estimated ecological niche models of *O. ishikawae* (Okinawa Isl.: left) and *O. splendida* (Amami Isl.: right). Warmer colors show areas with better predicted conditions. White dots show the presence of locations used for training in the analyses.
