# Supplementary material
Source: PubMed Central journal article supplement (PMC3522236)
Supplement: hdy201259x4.pdf [file hdy201259x4.pdf]

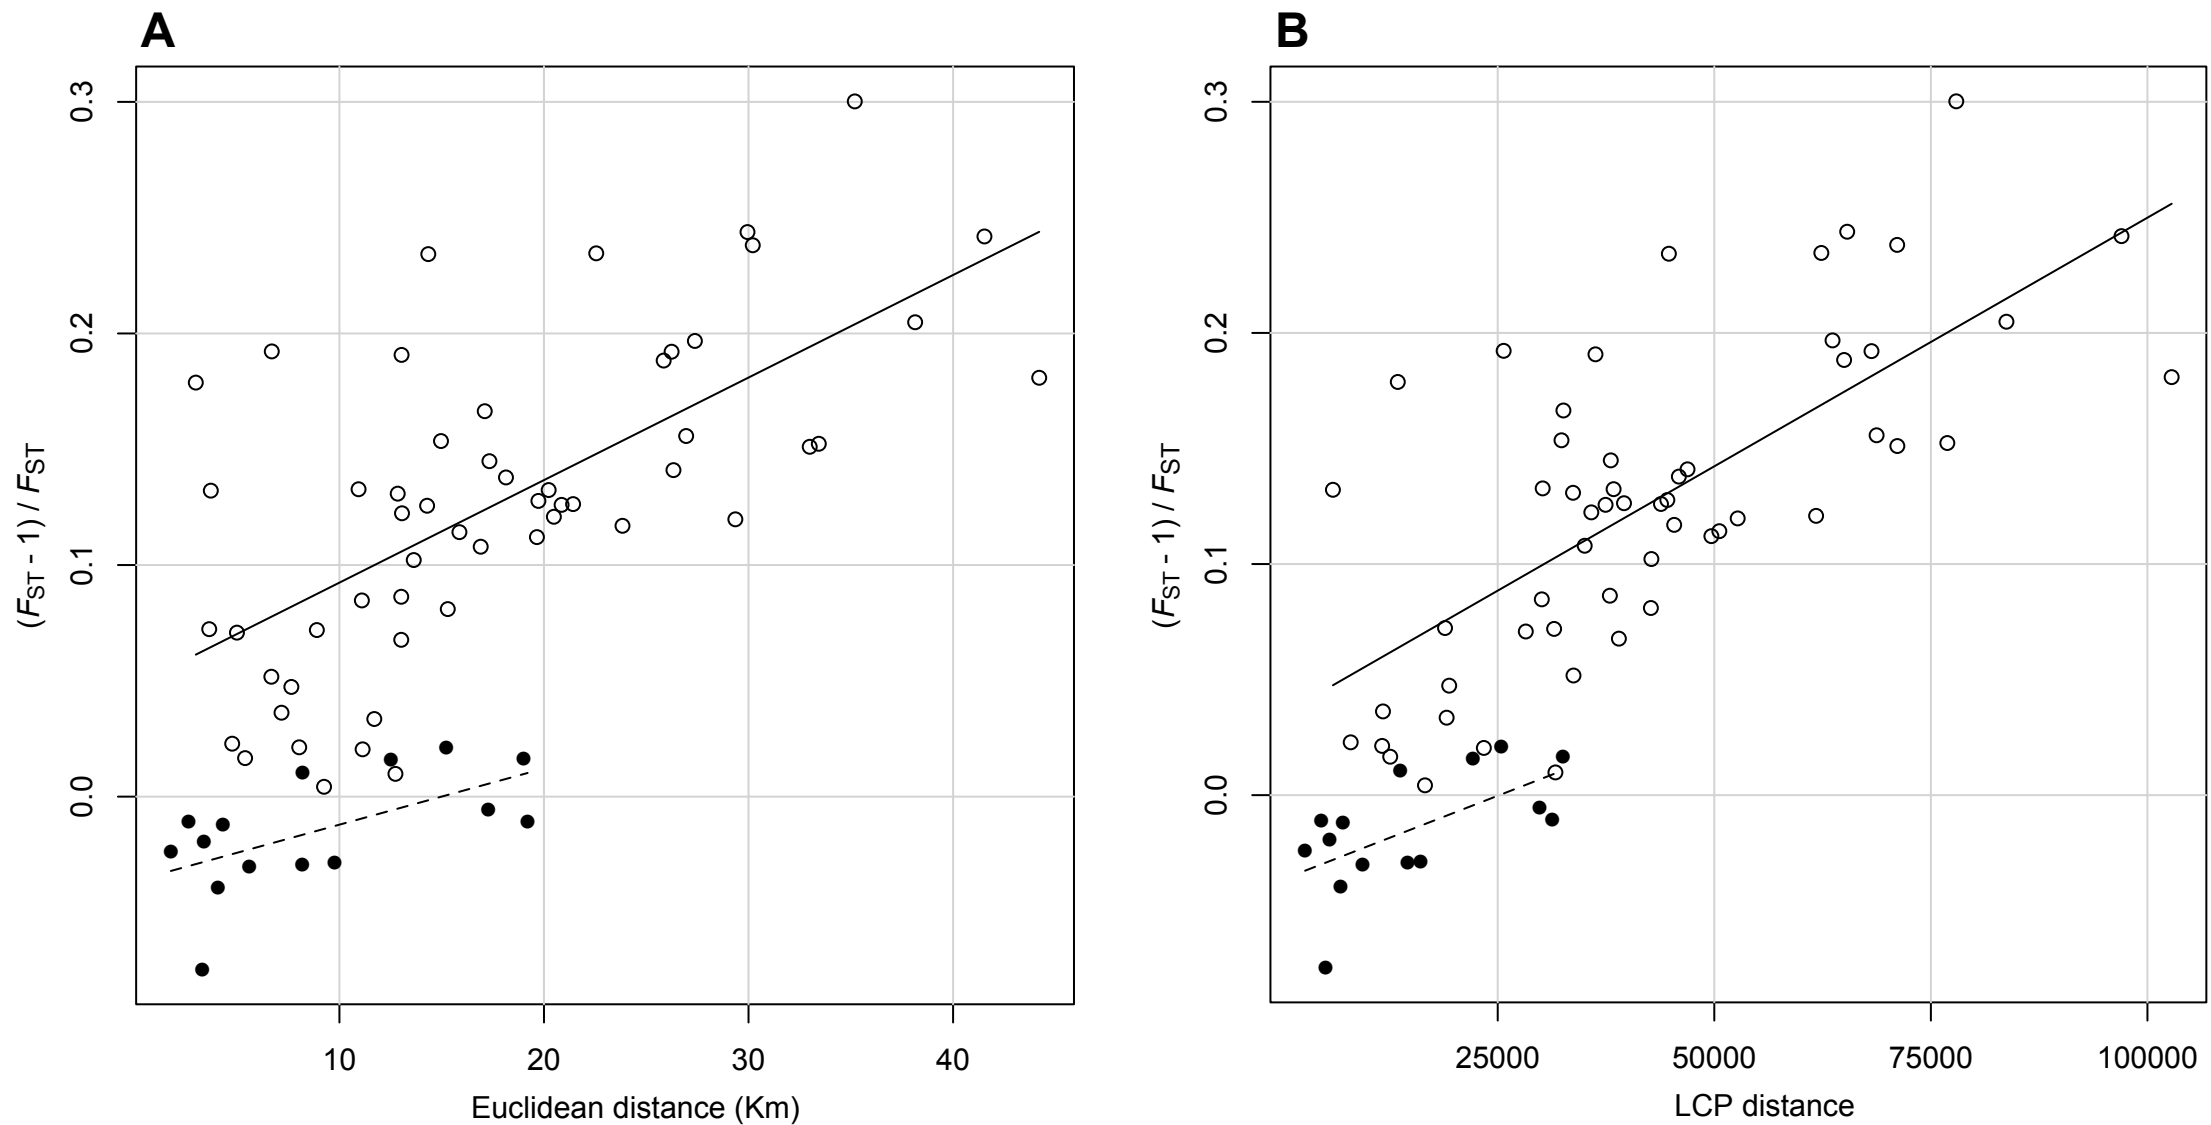

**Fig. S4.** Relationships between linearized  $F_{ST}$  and Euclidean and least cost path distances between populations using best-fitting models in each species. Linearized  $F_{ST}$  (Rousset 1997) values were plotted against (A) Euclidean distance and (B) LCP distance between populations within the same species. Solid circles indicate populations of *O. ishikawae* ( $r = 0.597$  and  $r = 0.610$  for Euclidean and LCP distances, respectively) and open circles indicate populations of *O. splendida* ( $r = 0.657$  and  $r = 0.699$  for Euclidean and LCP distances, respectively).
