# Supplementary material
Source: PubMed Central journal article supplement (PMC3522236)

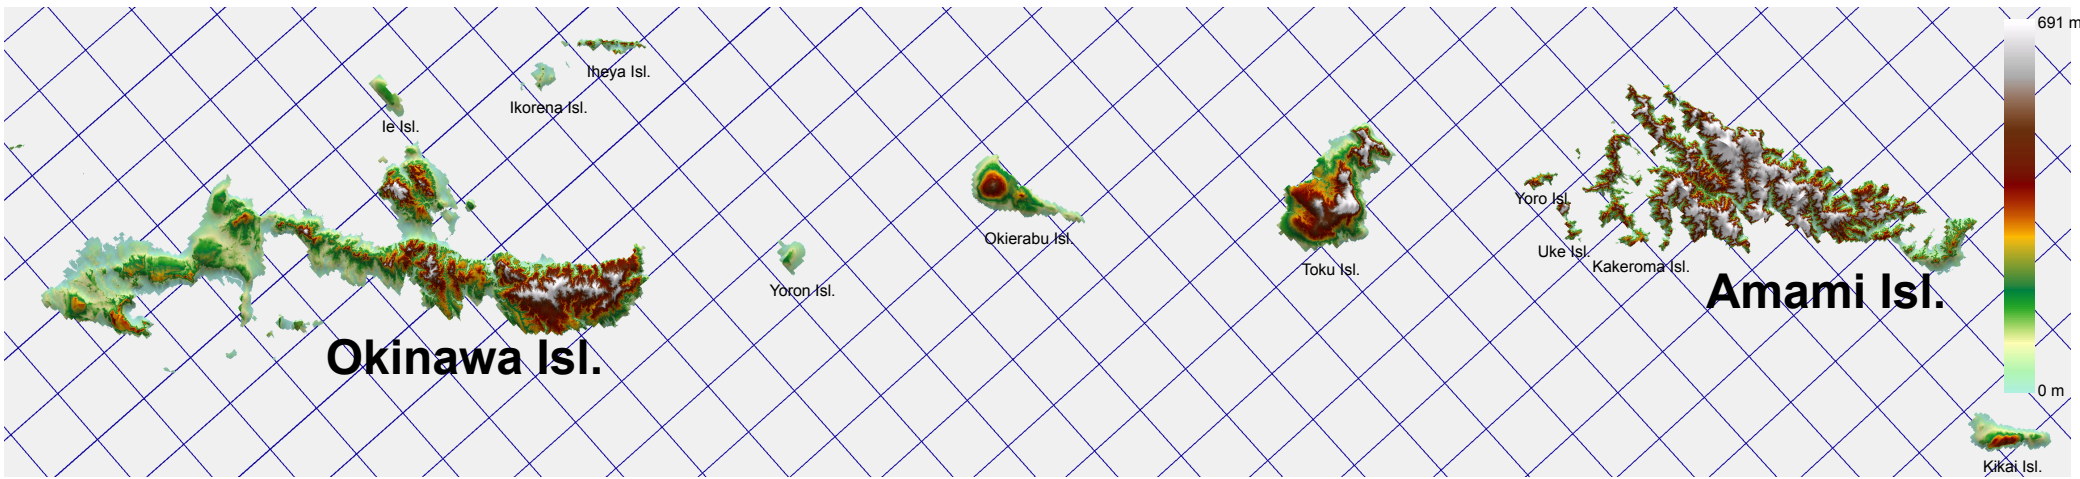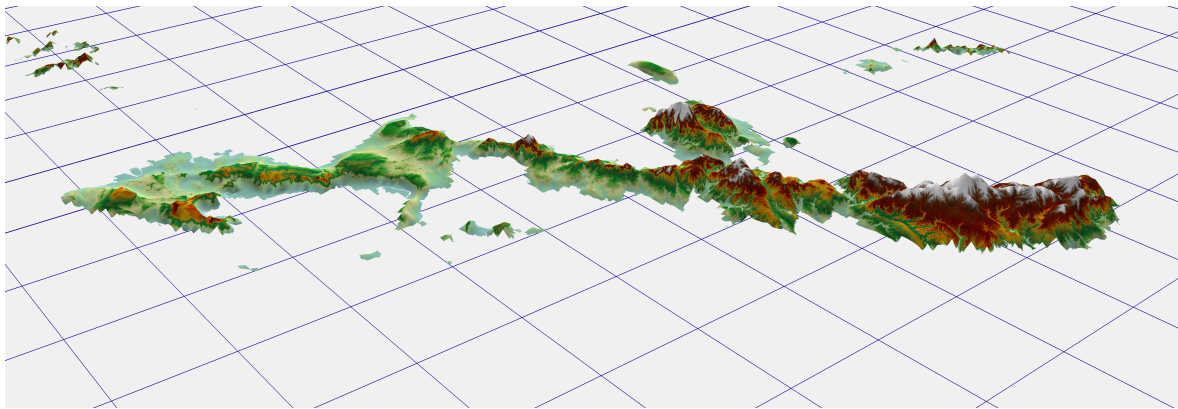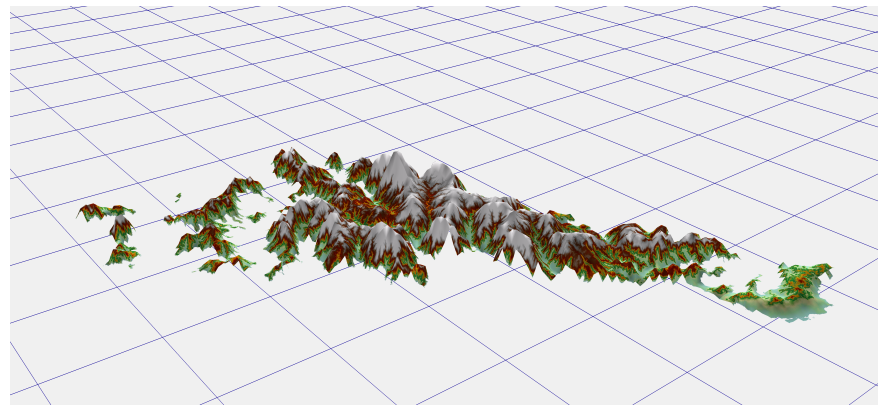

**Fig. S5.** Three dementional maps of Okinawa Isl. (*O. ishikawae*: left) and Amami Isl. (*O. splendida*: right).

Supplement: hdy201259x5.pdf [file hdy201259x5.pdf]
